# Women Appear to Have the Same Minimum Alveolar Concentration as Men

## A Retrospective Study

Edmond I Eger II, M.D.,\* Michael J. Laster, DVM,† George A. Gregory, M.D.,\* Takasumi Katoh, M.D.,‡ James M. Sonner, M.D.§

**Background:** A recent report finds that elderly Japanese women given xenon have a significantly smaller (26% less) MAC (minimum alveolar concentration required to eliminate movement in response to surgical incision in 50% of patients) than Japanese men of the same age. The authors assessed whether this finding applied to other/all anesthetics.

**Methods:** The authors reviewed data obtained previously for 258 patients (127 women and 131 men) anesthetized with desflurane, diethyl ether, halothane, methoxyflurane, sevoflurane, or xenon. Data were normalized to the MAC for the anesthetic as determined by logistic regression (*i.e.*, MAC would equal a value of 1.000.)

**Results:** The MAC for the normalized combined (all) data for women ( $1.013 \pm 0.017$ ; mean  $\pm$  SEM) did not differ significantly from the normalized combined data for men ( $1.005 \pm 0.009$ ), and neither differed significantly from 1.000. However, a significantly smaller MAC value was found for women in two studies of sevoflurane (subsets of the above studies) given to Japanese patients: 12% in one study and 16% in the other.

**Conclusions:** Overall, no difference in MAC was found for women *versus* men. Whether women (particularly older Japanese women) have a smaller MAC than men remains to be confirmed by prospective studies.

DOES gender influence the minimum alveolar concentration of an inhaled anesthetic required to eliminate movement in 50% of subjects given a noxious stimulus (MAC)? Goto *et al.*<sup>1</sup> used several arguments to suggest that MAC for nonpregnant women, particularly MAC for xenon, would be less than MAC for men. Consistent with their arguments, they found that the MAC for xenon for elderly women ( $71 \pm 5$  yr; mean  $\pm$  SD) was 26% less than MAC for elderly men ( $70 \pm 3$  yr). The MAC values were  $51.1 \pm 3.2\%$  xenon (mean  $\pm$  SEM) for 24

women *versus*  $69.3 \pm 3.2\%$  for 24 men ( $P < 0.01$  by unpaired *t* test.)

Studies in animals have not demonstrated that male animals differ in their MAC from female animals that are not pregnant. Isoflurane MAC for 129J female mice did not differ from the MAC for male mice.<sup>2</sup> Similarly, we found (unpublished data, Edmond Eger, M.D., Michael Laster, D.V.M., James Sonner, M.D., San Francisco, California, 2001) that MAC for desflurane, halothane, and/or isoflurane does not differ in three strains of mice. Other investigators found that MAC does not differ for halothane, isoflurane, and enflurane in male *versus* female Sprague-Dawley rats and Swiss Webster mice.<sup>3</sup> These investigators also found that pregnant rats and mice do not have MAC values different from those of nonpregnant female rats and mice, whereas other investigators report a lower MAC in pregnant than nonpregnant rats.<sup>4</sup>

Chronic progesterone administration can decrease MAC<sup>5</sup> and induce sleep in women,<sup>6</sup> but Tanifuji *et al.*<sup>7</sup> found that MAC did not differ in women as a function of their menstrual cycle, despite large differences in plasma progesterone. Other studies demonstrate that pregnancy in some animals<sup>4,8</sup> and in humans,<sup>9</sup> including early pregnancy<sup>10</sup> or immediately postpartum,<sup>11</sup> can decrease MAC. Gender does not affect the concentration of sevoflurane or isoflurane that allows awakening (MAC<sub>awake</sub>) in humans.<sup>12</sup>

Whether gender influences MAC, particularly in nonpregnant humans, therefore remains unclear. We thus asked whether the findings of Goto *et al.*<sup>1</sup> for xenon in elderly patients apply to other anesthetics. Specifically, we tested the hypothesis that MAC in men exceeds MAC in nonpregnant women.

## Materials and Methods

Data were retrieved for 258 patients (127 women and 131 men) from previous studies of MAC for desflurane and desflurane with 60% nitrous oxide,<sup>13</sup> diethyl ether,<sup>14</sup> halothane (several studies),<sup>15,16</sup> methoxyflurane,<sup>14</sup> sevoflurane (three studies),<sup>17–19</sup> and xenon.<sup>15</sup> The investigators for each of these had obtained approval for human studies as appropriate for the time period of the study. We limited the data taken from the various studies to patients who had been given 2.1 MAC or less. We also (arbitrarily) excluded data from studies in which either sex constituted less than 29% of all subjects.<sup>20,21</sup>

This article is featured in "This Month in Anesthesiology." Please see this issue of ANESTHESIOLOGY, page 5A.

\* Professor, † Assistant Biochemist, § Associate Professor, Department of Anesthesia and Perioperative Care, University of California. ‡ Assistant Professor, Department of Anesthesiology and Intensive Care, Hamamatsu University School of Medicine.

Received from the Department of Anesthesia and Perioperative Care, University of California, San Francisco, California, and the Department of Anesthesiology and Intensive Care, Hamamatsu University School of Medicine, Hamamatsu, Japan. Submitted for publication March 25, 2003. Accepted for publication June 3, 2003. Supported in part by the National Institutes of Health, Bethesda, Maryland, grant No. 1P01GM-47818-07. Dr. Eger is a paid consultant to Baxter Healthcare Corporation, New Providence, New Jersey.

Address reprint requests to Dr. Eger: Department of Anesthesia, S-455, University of California, San Francisco, California 94143-0464. Address electronic mail to: eger@anesthesia.ucsf.edu. Individual article reprints may be purchased through the Journal Web site, www.anesthesiology.org.

**Table 1. MAC Values for Men versus Women for Desflurane, Ether, Halothane, Methoxyflurane, Sevoflurane, and Xenon**

| Anesthetic                                | MAC*       | MAC†         | Women  |           |              | Men       |              | Ratio§ | P     |
|-------------------------------------------|------------|--------------|--------|-----------|--------------|-----------|--------------|--------|-------|
|                                           |            |              | % n    | Age‡      | MAC          | Age‡      | MAC          |        |       |
| Desflurane-O <sub>2</sub> <sup>13</sup>   | 6.00, 0.29 | 5.86, 0.13   | 42, 5  | 48, 7     | —            | 48, 9     | 5.84, 0.23   | —      | —     |
| Desflurane-N <sub>2</sub> O <sup>13</sup> | 2.83, 0.58 | 2.75, 0.75   | 44, 7  | 42, 10    | 2.31, 3.12   | 42, 10    | 2.59, 0.14   | 0.89   | NS    |
| Diethyl ether <sup>14</sup>               | 1.92       | 2.05, 0.11   | 44, 8  | 40, 10    | 2.29, 0.30   | 34, 14    | 1.94, 0.11   | 1.18   | NS    |
| Halothane <sup>16</sup>                   | 1.08       | 1.11, 0.02   | 45, 5  | 0.2, 0.2  | —            | 0.2, 0.1  | —            | —      | —     |
| Halothane <sup>16</sup>                   | 0.91       | 0.92, 0.02   | 29, 5  | 4.4, 1.1  | 0.86, 0.05   | 4.1, 0.9  | 0.92, 0.01   | 0.93   | NS    |
| Halothane <sup>16</sup>                   | 0.87       | 0.87, 0.02   | 50, 4  | 8.1, 1.3  | —            | 8.2, 1.0  | —            | —      | NS    |
| Halothane <sup>16</sup>                   | 0.92       | 0.92, 0.01   | 42, 5  | 16.4, 1.5 | —            | 14.9, 1.9 | 0.92, 0.01   | —      | —     |
| Halothane <sup>16</sup>                   | 0.84       | 0.81, 0.03   | 57, 12 | 24.3, 3.6 | 0.83, 0.03   | 25.7, 2.2 | 0.79, 0.05   | 1.06   | NS    |
| Halothane <sup>15</sup>                   | 0.76       | 0.77, 0.04   | 68, 17 | 38, 7     | 0.79, 0.05   | 50, 6     | 0.63, 0.36   | 1.25   | NS    |
| Methoxyflurane <sup>14</sup>              | 0.16       | 0.166, 0.012 | 59, 10 | 36, 8     | 0.178, 0.012 | 39, 10    | 0.147, 0.015 | 1.21   | NS    |
| Sevoflurane <sup>17</sup>                 | 2.05, 0.08 | 2.05, 0.10   | 44, 7  | 36, 5     | 2.02, 0.22   | 40, 5     | 2.17, 0.01   | 0.93   | NS    |
| Sevoflurane <sup>18</sup>                 | 1.84, 0.08 | 1.85, 0.08   | 60, 12 | 45, 11    | 1.76, 0.08   | 40, 12    | 2.10, 0.00   | 0.84   | <0.01 |
| Sevoflurane <sup>19</sup>                 | 1.85, 0.09 | 1.86, 0.06   | 57, 20 | 44, 11    | 1.76, 0.05   | 37, 9     | 2.01, 0.09   | 0.88   | <0.05 |
| Xenon <sup>15</sup>                       | 71         | 68.1, 4.3    | 33, 10 | 44, 19    | 60.5, 13.9   | 43, 16    | 71.5, 3.5    | 0.85   | NS    |

\* Published value, % atm; mean, SEM. † Recalculated value, % atm; mean, SEM. ‡ Average age in years, SD. § The MAC for women divided by the MAC for men. || Obtained by nonlinear regression.

MAC = minimum alveolar concentration.

A MAC value for each of the anesthetics had been calculated and published by the investigators for each of the above reports (table 1). Because the methods for determination of specific MAC values varied from report to report, we recalculated the MAC value for the combined (women plus men) data for each report using logistic regression.

Then, again using logistic regression, we separately determined the MAC for women and men from each report. In a few cases, we could not determine the MAC and variance using logistic regression because the concentrations for movement did not overlap those for non-movement. In many of these, we could determine MACs and SEMs by nonlinear regression to a sigmoid curve using an iterative Levenberg-Marquardt method with a bootstrapping approach, but in some cases, even this approach did not give reasonable values (e.g., we could not separately determine the desflurane-oxygen data for women).

All data were normalized by dividing the concentration values for individual patients by the combined MAC for both women and men for that anesthetic for a given report (e.g., three separate MAC values were used in the case of sevoflurane) as determined by logistic regression. We separated the data for desflurane plus 60% nitrous oxide from the remaining data and did not perform further analyses for the desflurane plus 60% nitrous oxide data because we did not wish to assume a desflurane equivalent for the nitrous oxide used. We combined the remaining normalized data for women and for men and used logistic regression to determine the MAC value (here, MAC becomes a value of 1.0, i.e., a normalized value) and SEM for men and (separately) women. The difference in the MAC values for gender within a given anesthetic, and the difference in the MAC values for the combined data for each sex were compared by use of an

unpaired 2-tailed Student's *t* test with no correction for multiple comparisons. We accepted  $P < 0.05$  as indicating a significant difference.

## Results

MAC values determined by logistic regression were virtually identical to the previously published values, differing by  $0.3 \pm 2.9\%$  (mean  $\pm$  SD for 14 values, table 1; no difference was statistically significant.) In 2 (both sevoflurane) of 10 comparisons, the MAC for men significantly exceeded the MAC for women. In no comparison was the value for men significantly less than the value for women. The MAC for the normalized combined (all) data for women ( $1.013 \pm 0.017$ ; mean  $\pm$  SEM) did not differ significantly from the normalized combined data for men ( $1.005 \pm 0.009$ ) (fig. 1) (MAC itself would equal a value of 1.000). Considering all data except those for sevoflurane, the normalized MAC for men ( $0.999 \pm 0.009$ ) did not differ from that for women ( $1.030 \pm 0.019$ ). However, considering only the data for sevoflurane, the normalized MAC for men ( $1.052 \pm 0.015$ ) significantly ( $P < 0.01$ ) exceeded the MAC for women ( $0.957 \pm 0.025$ ), women having a value 9% less than men.

## Discussion

Overall, we found no difference in the MAC for women versus men. However, consistent with the report by Goto *et al.*,<sup>1</sup> we found two instances in which the MAC for men significantly exceeded the MAC for women (table 1). Both of these were for sevoflurane,<sup>18,19</sup> and both were obtained in Japanese patients. The differences between men and women found by Katoh *et al.*

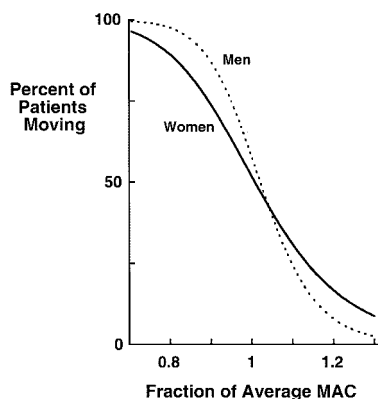

**Fig. 1.** The end-tidal concentrations breathed by individual patients from a given report were divided by the MAC for the anesthetic, as determined by logistic regression for the data from that report. These normalized data then were divided into those for women and those for men, and the divided data were analyzed by logistic regression. The resulting analysis shown here gave a MAC for women of  $1.013 \pm 0.017$  (mean  $\pm$  SEM) and  $1.005 \pm 0.009$  for men (MAC itself would equal a value of 1.000; the difference between men and women was not statistically significant).

(12 and 16%)<sup>18,19</sup> were smaller than the difference found by Goto *et al.* (26%).<sup>1</sup> None of the remaining anesthetics demonstrated a significant difference, although the MAC for women given xenon by Cullen *et al.*<sup>15</sup> was 15% less than the MAC for men (table 1).

Overall, for six anesthetics and eight reports, we found no difference between the MAC for women and the MAC for men in a total of 258 patients (fig. 1). Thus, our findings do not support the suggestion that women generally have smaller MAC values than do men. We also do not find that younger women given xenon have a MAC significantly different from men of a similar age.

Are there subsets of patients in which women demonstrate a smaller MAC than men? Do Japanese women have smaller MAC values than Japanese men, and if such a difference exists, does it increase with increasing age? Such questions remain to be answered, but some observations suggest that the answer to both questions is that probably no difference exists. Aging should minimize or eliminate hormonal differences that otherwise might explain a difference between women and men. Many of the North American studies were done in San Francisco,

where a substantial fraction of the population comes from the Far East. No obvious difference appeared in these studies, but race was not formally considered in the evaluation of the data.

The authors gratefully acknowledge the several helpful suggestions made by Daniel I. Sessler, M.D., Director, Outcomes Research Institute, University of Louisville, Louisville, Kentucky.

## References

- Goto T, Nakata Y, Morita S: The minimum alveolar concentration of xenon in the elderly is sex-dependent. *ANESTHESIOLOGY* 2002; 97:1129-32
- Flood P, Sonner JM, Gong D, Coates KM: Heteromeric nicotinic inhibition by isoflurane does not mediate MAC or loss of righting reflex. *ANESTHESIOLOGY* 2002; 97:902-5
- Mazze RI, Rice SA, Baden JM: Halothane, isoflurane, and enflurane MAC in pregnant and nonpregnant female and male mice and rats. *ANESTHESIOLOGY* 1985; 62:339-41
- Strout CD, Nahrwold ML: Halothane requirement during pregnancy and lactation in rats. *ANESTHESIOLOGY* 1981; 55:322-3
- Datta S, Migliozi RP, Flannagan HL, Kreiger NR: Chronically administered progesterone decreases halothane requirements in rabbits. *Anesth Analg* 1989; 68:45-50
- Merryman W, Boiman R, Barnes L, Rothchild I: Progesterone "anesthesia" in human subjects. *J Clin Endocrinol Metab* 1954; 14:1567-9
- Tanifuji Y, Mima S, Yasuda N, Machida H, Shimizu T, Kobayashi K: Effect of menstrual cycle on MAC [in Japanese]. *Masui* 1988; 37:1240-2
- Palahniuk RJ, Shnider SM, Eger EI II: Pregnancy decreases the requirement for inhaled anesthetic agents. *ANESTHESIOLOGY* 1974; 41:82-3
- Gin T, Chan MT: Decreased minimum alveolar concentration of isoflurane in pregnant humans. *ANESTHESIOLOGY* 1994; 81:829-32
- Chan MTV, Mainland P, Gin T: Minimum alveolar concentration of halothane and enflurane are decreased in early pregnancy. *ANESTHESIOLOGY* 1996; 85:782-6
- Zhou HH, Norman P, DeLima LJR, Mehta M, Bass D: The minimum alveolar concentration of isoflurane in patients undergoing bilateral tubal ligation in the postpartum period. *ANESTHESIOLOGY* 1995; 82:1364-8
- Katoh T, Suguro Y, Ikeda T, Kazama T, Ikeda K: Influence of age on awakening concentrations of sevoflurane and isoflurane. *Anesth Analg* 1993; 76:348-52
- Rampil IJ, Lockhart S, Zwass M, Peterson N, Yasuda N, Eger EI II, Weiskopf RB, Damask MC: Clinical characteristics of desflurane in surgical patients: Minimum alveolar concentration. *ANESTHESIOLOGY* 1991; 74:429-33
- Saidman IJ, Eger EI II, Munson ES, Babad AA, Muallem M: Minimum alveolar concentrations of methoxyflurane, halothane, ether and cyclopropane in man: Correlation with theories of anesthesia. *ANESTHESIOLOGY* 1967; 28:994-1002
- Cullen SC, Eger EI II, Cullen BF, Gregory P: Observations on the anesthetic effect of the combination of xenon and halothane. *ANESTHESIOLOGY* 1969; 31:305-9
- Gregory GA, Eger EI II, Munson ES: The relationship between age and halothane requirement in man. *ANESTHESIOLOGY* 1969; 30:488-91
- Scheller MS, Partridge BL, Saidman IJ: MAC of sevoflurane in humans and the New Zealand White rabbit. *Can Anaesth Soc J* 1988; 35:153-6
- Katoh T, Ikeda K: The effects of fentanyl on sevoflurane requirements for loss of consciousness and skin incision. *ANESTHESIOLOGY* 1998; 88:18-24
- Katoh T, Kobayashi S, Suzuki A, Iwamoto T, Bito H, Ikeda K: The effect of fentanyl on sevoflurane requirements for somatic and sympathetic responses to surgical incision. *ANESTHESIOLOGY* 1999; 90:398-405
- Bridges BE Jr, Eger EI II: The effect of hypocapnia on the level of halothane anesthesia in man. *ANESTHESIOLOGY* 1966; 27:634-7
- Forbes AR, Cohen NH, Eger EI II: Pancuronium reduces halothane requirement in man. *Anesth Analg* 1979; 58:497-9
